# Supplementary material
Source: HighWire-hosted journal article supplement (https://rmdopen.bmj.com/content/10/1/e003440)
Supplement: inline-supplementary-material-1 [file inline-supplementary-material-1.pdf]

## Supplementary files for manuscript

## Effect of high-intensity interval training in physiotherapy primary care for patients with inflammatory arthritis: The ExeHeart randomized controlled trial

Table a: Baseline characteristics for all study participants, exercise group and control group; supplementary data. Data are presented as mean (SD) unless otherwise indicated.

| Baseline characteristics                                       | All<br>n=60      | Exercise group<br>n=30 | Control group<br>n=30 |
|----------------------------------------------------------------|------------------|------------------------|-----------------------|
| <i>Anthropometric measures</i> <sup>§</sup>                    |                  |                        |                       |
| Waist circumference, cm                                        | 93 (12)          | 91 (11)                | 95 (13)               |
| Fat mass, kg <sup>b</sup> , median (IQR)                       | 18.8 (13.5-26.7) | 17 (13.6-23.4)         | 22.9 (13.5-27.6)      |
| Fat-free mass <sup>b</sup> , kg                                | 54.4 (11.8)      | 53.5 (12.6)            | 55 (11.2)             |
| Fat mass, % body weight                                        | 26.4 (7.4)       | 25.6 (6.6)             | 27.3 (8.1)            |
| Visceral fat indicator <sup>b</sup> , median (IQR)             | 7 (5-10)         | 7 (5-9)                | 8 (6-12)              |
| <i>Inflammatory markers</i>                                    |                  |                        |                       |
| CRP, mg/L, median (IQR)                                        | 1 (1-2)          | 1 (1-2)                | 2 (1-3)               |
| ESR, mm, median (IQR)                                          | 9 (5-15)         | 7 (4-15)               | 10 (5-16)             |
| <i>Clinical disease activity</i>                               |                  |                        |                       |
| DAS28 <sup>d</sup> , median (IQR)                              | 2.4 (2.1-4.4)    | 2.4 (2.1-4.4)          | 2.8 (2.2-3.8)         |
| DAPSA <sup>e</sup> , median (IQR)                              | 8.5 (5-29)       | 8 (4-26)               | 10.5 (6-36)           |
| ASDAS <sup>f</sup> , median (IQR)                              | 1.9 (1.2-2.4)    | 2.0 (1.1-2.2)          | 1.7 (1.3-3.1)         |
| <i>Clinical disease category</i>                               |                  |                        |                       |
| Remission, n (%)                                               | 22 (37)          | 12 (40)                | 10 (33)               |
| Low, n (%)                                                     | 17 (28)          | 6 (20)                 | 11 (37)               |
| Moderate, n (%)                                                | 14 (23)          | 9 (30)                 | 5 (17)                |
| High, n (%)                                                    | 7 (12)           | 3 (10)                 | 4 (13)                |
| <i>Self-reported disease activity, 0-10, 10= worst</i>         |                  |                        |                       |
| RAID <sup>d</sup> , median (IQR)                               | 1.8 (1.0-3.6)    | 3.3 (1.8-4.4)          | 1.8 (0.4-3.2)         |
| PsAID <sup>e</sup> , median (IQR)                              | 1.0 (0.4-1.6)    | 0.9 (0.3-1.3)          | 1.2 (0.8-1.7)         |
| BASDAI <sup>f</sup> , median (IQR)                             | 2.3 (1.2-4.5)    | 3.4 (1.5-4.1)          | 2.2 (1.2-6.5)         |
| BASFI <sup>f</sup> , 0-10, 10= impossible, median (IQR)        | 2 (1-2.8)        | 2.2 (0.9-2.6)          | 1.9 (1.2-3.2)         |
| BAS-G <sup>f</sup> , 0-10, 10= very severe, median (IQR)       | 3.5 (1-4.5)      | 3.5 (1-4.5)            | 2.8 (1.5-6.5)         |
| <i>EQ-5D-5L</i>                                                |                  |                        |                       |
| Utility index (0-1), 1=best, median (IQR)                      | 0.87 (0.82-0.94) | 0.86 (0.81-0.94)       | 0.88 (0.83-0.94)      |
| EQ-VAS (0-100), 100=best, median (IQR)                         | 70 (50-80)       | 70 (60-80)             | 60 (40-85)            |
| <i>CardioPulmonary Exercise Test</i>                           |                  |                        |                       |
| <i>Spirometry</i>                                              |                  |                        |                       |
| Forced vital capacity, L                                       | 3.9 (1.0)        | 3.8 (1.0)              | 3.9 (1.0)             |
| Forced expiratory volume, L                                    | 2.9 (0.7)        | 2.8 (0.7)              | 3.0 (0.8)             |
| Peak expiratory flow, L/min, median (IQR)                      | 7.50 (6.2-8.5)   | 6.7 (6.0-8.5)          | 7.3 (6.3-8.6)         |
| Maximal voluntary ventilation, L/min, median (IQR)             | 115 (94-133)     | 115 (94-137)           | 115 (93-131)          |
| <i>Ventilatory threshold 1</i>                                 |                  |                        |                       |
| VO <sub>2</sub> , mL/kg/min                                    | 17.5 (3.8)       | 17.9 (4.0)             | 17.2 (3.7)            |
| Heart rate, beats/min                                          | 107 (11)         | 105 (10)               | 109 (12)              |
| <i>Ventilatory threshold 2<sup>a</sup></i>                     |                  |                        |                       |
| VO <sub>2</sub> , mL/kg/min, median (IQR)                      | 25.6 (20.9-28.9) | 27.3 (24.4-27.4)       | 23.9 (20.7-28.9)      |
| Heart rate, beat/min                                           | 138 (15)         | 138 (15)               | 138 (14)              |
| <i>VE/VO<sub>2</sub></i>                                       |                  |                        |                       |
| at ventilatory threshold 1, median (IQR)                       | 21 (20-23)       | 21 (20-23)             | 22 (20-23)            |
| at ventilatory threshold 2, median (IQR) <sup>a</sup>          | 26 (23-27)       | 26 (23-27)             | 26 (25-27)            |
| <i>VE/VCO<sub>2</sub></i>                                      |                  |                        |                       |
| at ventilatory threshold 1, median (IQR)                       | 29 (27-31)       | 29 (27-30)             | 30 (28-32)            |
| at ventilatory threshold 2, median (IQR) <sup>a</sup>          | 28 (26-29)       | 28 (26-29)             | 28 (26-30)            |
| VO <sub>2peak</sub> over fat-free mass, mL/kg/min <sup>b</sup> | 43.1 (7.0)       | 42.8 (6.2)             | 43.3 (7.7)            |
| <i>Blood pressure and arterial stiffness</i>                   |                  |                        |                       |
| Systolic, mmHg                                                 | 127 (13)         | 125 (12)               | 129 (14)              |
| Diastolic, mmHg                                                | 83 (10)          | 82 (10)                | 85 (8)                |
| Mean arterial pressure, mmHg                                   | 103 (10)         | 102 (10)               | 105 (10)              |
| Pulse wave velocity, m/s                                       | 8.2 (1.0)        | 8.2 (1.1)              | 8.2 (1.0)             |
| Augmentation index                                             | 22.1 (13.1)      | 21.3 (13.4)            | 22.8 (12.9)           |
| <i>Lipids</i>                                                  |                  |                        |                       |

|                                    |           |           |           |
|------------------------------------|-----------|-----------|-----------|
| Total cholesterol, mmol/L          | 4.8 (1.2) | 4.9 (1.4) | 4.6 (1.1) |
| HDL-c, mmol/L                      | 1.7 (0.3) | 1.7 (0.5) | 1.6 (0.5) |
| LDL-c, mmol/L                      | 2.6 (1.2) | 2.7 (1.3) | 2.5 (1.1) |
| Triglycerides, mmol/L              | 1.4 (0.7) | 1.3 (0.6) | 1.4 (0.8) |
| SCORE2 <sup>g</sup> , median (IQR) | 4 (3-6)   | 4 (3-5)   | 4.5 (3-7) |

<sup>a</sup>  $n=58$ . <sup>b</sup>  $n=59$ . <sup>c</sup>  $n=57$ , values  $\geq 20$  omitted. <sup>d</sup> patients with RA,  $n=27$ . <sup>e</sup> patients with PsA,  $n=14$ . <sup>f</sup> patients with SpA,  $n=19$ . <sup>g</sup> calculated in patients free from statins and blood pressure medication,  $n=23$ . ASDAS: Ankylosing Spondylitis Disease Activity Score, BASDAI: Bath Ankylosing Spondylitis Disease Activity Index, BASFI: Bath Ankylosing Spondylitis Functional Index, BAS-G: Bath Ankylosing Spondylitis Patient Global Score, CRP: C-reactive protein, CVD: Cardiovascular disease, DAS28: Disease Activity Score Calculator for RA, DAPSA: Disease Activity Index for Psoriatic Arthritis, ESR: erythrocyte sedimentation rate, HDL: high-density lipoprotein, HR: heart rate, LDL: low-density lipoprotein, PsAID: Psoriatic Arthritis Impact of Disease, RAID: Rheumatoid Arthritis Impact of Disease, SCORE2: Systemic COronary Risk Estimation 2, VCO<sub>2</sub>: volume of carbon dioxide, V<sub>E</sub>: minute ventilation, VO<sub>2</sub>: volume of oxygen

Table b: Efficacy results in outcome from baseline to 3-month follow-up. Values are presented as mean (SD) unless otherwise indicated. Significant differences signaled by \*

|                                                          | Exercise group |                |               | Control group |               |               | Estimated mean group difference (95% CI) <sup>a</sup> | p values                      |                      |
|----------------------------------------------------------|----------------|----------------|---------------|---------------|---------------|---------------|-------------------------------------------------------|-------------------------------|----------------------|
|                                                          | n              | Baseline       | 3 months      | n             | Baseline      | 3 months      |                                                       |                               |                      |
| <b>Primary outcome (no imputations)</b>                  |                |                |               |               |               |               |                                                       |                               |                      |
| VO <sub>2peak</sub> , ml/kg/min                          | 27             | 30.4 (5.9)     | 32.9 (6.4)    | 28            | 30.1 (7.9)    | 30.3 (7.5)    | 55 <sup>^</sup>                                       | 2.4 (0.8- 3.9)                | <0.01*               |
| <b>Primary outcome (per protocol)</b>                    |                |                |               |               |               |               |                                                       |                               |                      |
| VO <sub>2peak</sub> , ml/kg/min                          | 19             | 29.5 (6.2)     | 32.4 (6.7)    | 20            | 30.3 (8.1)    | 30.1 (8.1)    | 39                                                    | 3.2 (1.7-4.8)                 | 0.000*               |
| VO <sub>2peak</sub> , L/min                              | 19             | 2.2 (0.7)      | 2.4 (0.7)     | 20            | 2.4 (0.6)     | 2.4 (0.6)     | 39                                                    | 0.2 (0.1-0.3)                 | 0.002*               |
| <b>Secondary outcomes (no imputations)</b>               |                |                |               |               |               |               |                                                       |                               |                      |
| VO <sub>2peak</sub> , L/min                              | 27             | 2.3 (0.76)     | 2.5 (0.73)    | 28            | 2.4 (0.62)    | 2.4 (0.62)    | 55 <sup>^</sup>                                       | 0.13 (0.03- 0.23)             | 0.01*                |
| Change in VO <sub>2peak</sub> ≥3.5 ml/kg/min, yes, n (%) | 27             | na             | 9 (33)        | 28            | na            | 4 (14)        | 55                                                    |                               | 0.10 <sup>c</sup>    |
| Resting heart rate beat/min§                             | 28             | 64 (9)         | 61 (7)        | 29            | 73 (11)       | 69 (11)       | 57                                                    | -3 (-7- 1)                    | 0.11                 |
| <i>Body composition</i>                                  |                |                |               |               |               |               |                                                       |                               |                      |
| Waist circumference, cm                                  | 28             | 91 (12)        | 90 (13)       | 29            | 95 (13)       | 95 (13) 22.8  | 7                                                     | -1.0 (-2.6- 0.5)              | 0.19                 |
| Fat mass, kg                                             | 28             | 19.3 (7.6)     | 18.9 (7.7)    | 28            | 22.6 (8.7)    | (8.8)         | 56                                                    | -0.7 (-1.7-0.4) <sup>d</sup>  | 0.21                 |
| Fatmass, % body weight                                   | 28             | 25.1 (6.6)     | 24.6 (7.4)    | 28            | 27.8 (7.9)    | 27.9 (7.8)    | 56                                                    | -0.6 (-1.6-0.4)               | 0.22                 |
| Visceral fat indicator                                   | 28             | 7.9 (4.0)      | 7.8 (3.9)     | 28            | 8.7 (3.7)     | 8.9 (3.9)     | 56                                                    | -0.2 (-0.7-0.2) <sup>d</sup>  | 0.31                 |
| <i>Blood pressure and arterial stiffness</i>             |                |                |               |               |               |               |                                                       |                               |                      |
| Mean arterial pressure, mm Hg                            | 28             | 101 (10)       | 103 (13)      | 29            | 105 (10)      | 104 (9)       | 57                                                    | 1 (-3-5)                      | 0.60                 |
| Pulse wave velocity, m/s                                 | 25             | 8.3 (1.1) 20.0 | 8.3 (1.0)     | 28            | 8.2 (1.0)     | 8.2 (1.1)     | 53                                                    | 0.0 (-0.2-0.2) <sup>d</sup>   | 0.80                 |
| Augmentation index                                       | 25             | (13.3)         | 24.4 (18)     | 25            | 23.2 (13.1)   | 21.9 (13.1)   | 53                                                    | 3.5 (-5.3-12.3)               | 0.43                 |
| SCORE2 median (IQR) §                                    | 10             | 3 (2-6)        | 3.5 (2-5)     | 9             | 4 (3-6)       | 5 (3-6)       | 19                                                    |                               | 0.93 <sup>b</sup>    |
| Presence of increased CVD, n (%)                         | 28             | 23 (82)        | 23 (82)       | 30            | 25 (83)       | 27 (90)       | 58                                                    |                               | 0.34 <sup>c</sup>    |
| RAID, 0-10, 10=worst, median (IQR) <sup>□</sup>          | 10             | 3.3 (1.8-4.4)  | 2.9 (1.8-3.9) | 15            | 1.8 (0.4-3.2) | 1.8 (0.7-2.9) | 25                                                    |                               | 0.82 <sup>b</sup>    |
| PsAID, 0-10, 10=worst, median (IQR) <sup>#</sup>         | 6              | 0.9 (0.3-1.0)  | 0.7 (0-1.3)   | 5             | 1.5 (0.8-1.7) | 1.3 (0.6-1.6) | 11                                                    |                               | 0.52 <sup>b</sup>    |
| BASDAI, 0-10, 10=severe, median (IQR) <sup>£</sup>       | 10             | 2.7 (1.5-4.0)  | 2.4 (1.4-4.4) | 8             | 2.2 (1.2-6.5) | 2.2 (0.8-6.3) | 18                                                    |                               | 0.42 <sup>b</sup>    |
| BASFI, 0-10, 10=impossible, median (IQR) <sup>£</sup>    | 9              | 2.2 (0.9-2.5)  | 1.6 (0.6-1.9) | 8             | 1.9 (1.2-3.2) | 1.9 (1.0-2.3) | 17                                                    |                               | 0.44 <sup>b</sup>    |
| BAS-G, 0-10, 10= very severe, median (IQR) <sup>£</sup>  | 10             | 3.0 (1.0-4.0)  | 2.8 (1.5-4)   | 8             | 2.8 (1.5-6.5) | 4.5 (1.5-5.5) | 18                                                    |                               | 0.64 <sup>b</sup>    |
| EuroQol-5D-5L utility index, 0-1, 1= best health state   | 28             | 0.86 (0.11)    | 0.87 (0.10)   | 29            | 0.85 (0.11)   | 0.86 (0.11)   | 57                                                    | 0.01 (-0.03-0.0) <sup>d</sup> | 0.58                 |
| EuroQol-5D-5L, VAS 0-100, 100= best imaginable health)   | 28             | 65 (18)        | 75 (17)       | 29            | 61 (21)       | 63 (20)       | 57                                                    | 11 (1-20) <sup>d</sup>        | 0.02*                |
| <i>Self-reported change in CRF, n (%)</i>                |                |                |               |               |               |               |                                                       |                               |                      |
| Much better                                              |                |                | 10 (34)       |               |               | 1 (3)         |                                                       |                               |                      |
| Somewhat better                                          |                |                | 17 (59)       |               |               | 5 (17)        |                                                       |                               |                      |
| Unchanged                                                |                |                | 1 (3)         |               |               | 22 (73)       |                                                       |                               |                      |
| Somewhat worse                                           |                |                | 1 (3)         |               |               | 2 (3)         |                                                       |                               |                      |
| Much worse                                               | 29             | na             | 0 (0)         | 30            | na            | 0 (0)         | 59                                                    |                               | <0.001 <sup>c*</sup> |
| <i>Exercise beliefs and self-efficacy (sub-domains)</i>  |                |                |               |               |               |               |                                                       |                               |                      |
| Self-efficacy, 1-20, 20=best                             | 29             | 16.4 (2.4)     | 16.9 (2.6)    | 30            | 15.9 (3.3)    | 15.5 (3.4)    | 59                                                    | 1.1 (-0.2-2.4)                | 0.09                 |
| Barriers to exercise, 1-15, 15=best                      | 28             | 12.8 (1.7)     | 12.4 (1.6)    | 29            | 11.7 (1.9)    | 11.4 (2.5)    | 57                                                    | 0.2 (-0.7-1.1)                | 0.67                 |
| Benefits of exercise, 1-25, 25=best                      | 28             | 21.9 (2.3)     | 21.2 (2.8)    | 26            | 20.7 (3.0)    | 20.7 (3.1)    | 54                                                    | -0.4 (-1.7-0.9)               | 0.51                 |
| Impact of exercise on IJD, 1-40, 40=best                 | 28             | 31.2 (3.4)     | 31.4 (3.4)    | 28            | 29.8 (3.6)    | 29.9 (3.0)    | 56                                                    | 0.7 (-0.7-2.2)                | 0.31                 |

<sup>^</sup>Primary analysis without multiple imputation, § All patients, including patient with change in betablocker from baseline (n=1) § calculated in patients free from statins and blood pressure medication at baseline and 3-months. <sup>a</sup>Analysed with ANCOVA with gender, group, age at baseline and baseline value as covariates.

<sup>b</sup>Analysed with Wilcoxon rank sum. <sup>c</sup>Analysed with Chi-square test. <sup>d</sup>Bootstrap CI with 10000 replications. <sup>□</sup>patients with RA, <sup>#</sup>patients with PsA, <sup>£</sup>patients with SpA. BASDAI: Bath Ankylosing Spondylitis Disease Activity Index, BASFI: Bath Ankylosing Spondylitis Functional Index, BAS-G: Bath Ankylosing Spondylitis Patient Global Score, CRF: Cardiorespiratory fitness, CVD: Cardiovascular disease, IJD: Inflammatory joint disease, PsAID: Psoriatic Arthritis Impact of Disease, RAID: Rheumatoid Arthritis Impact of Disease, SCORE2: Systemic COronary Risk Estimation 2, VO<sub>2peak</sub>: Peak oxygen uptake

Table c: Efficacy results in outcome from baseline to 6-month follow-up. Values are presented as mean (SD) unless otherwise indicated. Significant differences signaled by \*

|                                                          | Exercise group |               |               | Control group |               |               | Estimated mean group difference (95% CI) <sup>a</sup> | p values                      |                      |
|----------------------------------------------------------|----------------|---------------|---------------|---------------|---------------|---------------|-------------------------------------------------------|-------------------------------|----------------------|
|                                                          | n              | Baseline      | 3 months      | n             | Baseline      | 3 months      |                                                       |                               |                      |
| <b>Primary outcome (no imputations)</b>                  |                |               |               |               |               |               |                                                       |                               |                      |
| VO <sub>2peak</sub> , ml/kg/min                          | 27             | 30.4 (5.9)    | 33.2 (7.4)    | 28            | 30.4 (8.0)    | 30.7 (7.8)    | 55 <sup>^</sup>                                       | 2.6 (0.8- 4.4)                | <0.01*               |
| <b>Secondary outcomes (no imputations)</b>               |                |               |               |               |               |               |                                                       |                               |                      |
| VO <sub>2peak</sub> , L/min                              | 27             | 2.3 (0.8)     | 2.5 (0.7)     | 28            | 2.4 (0.6)     | 2.4 (0.6)     | 55 <sup>^</sup>                                       | 0.14 (0.0- 0.2)               | 0.01*                |
| Change in VO <sub>2peak</sub> ≥3.5 ml/kg/min, yes, n (%) | 27             | na            | 9 (33)        | 28            | na            | 3 (11)        | 55                                                    |                               | 0.04 <sup>c</sup>    |
| Resting heart rate beat/min <sup>§</sup>                 | 28             | 64 (9)        | 63 (8)        | 30            | 72 (12)       | 67 (8)        | 58                                                    | -0 (-4- 4)                    | 0.90                 |
| <i>Body composition</i>                                  |                |               |               |               |               |               |                                                       |                               |                      |
| Waist circumference, cm                                  | 28             | 91 (12)       | 91 (13)       | 30            | 95 (13)       | 95 (12)       | 58                                                    | -0.1 (-2.6-1.6)               | 0.65                 |
| Fat mass, kg                                             | 28             | 19.3 (7.6)    | 19.4 (8.2)    | 29            | 22.3 (8.8)    | 22.3 (8.8)    | 57                                                    | 0.1 (-1.2-1.3) <sup>d</sup>   | 0.89                 |
| Fatmass, % body weight                                   | 28             | 25.1 (6.6)    | 25.1 (7.3)    | 29            | 27.3 (8.1)    | 27.3 (7.9)    | 57                                                    | 0.1 (-1.1-1.3)                | 0.89                 |
| Visceral fat indicator                                   | 28             | 7.9 (4.0)     | 7.9 (4.1)     | 29            | 8.7 (3.7)     | 8.7 (3.5)     | 57                                                    | -0.0 (-0.5-0.5) <sup>d</sup>  | 0.96                 |
| <i>Blood pressure and arterial stiffness</i>             |                |               |               |               |               |               |                                                       |                               |                      |
| Mean arterial pressure, mm Hg                            | 28             | 101 (10)      | 103 (11)      | 30            | 105 (10)      | 102 (10)      | 58                                                    | 3 (-1-8) <sup>d</sup>         | 0.15                 |
| Pulse wave velocity, m/s                                 | 27             | 8.2 (1.1)     | 8.3 (1.1)     | 27            | 8.1 (1.0)     | 8.1 (1.2)     | 54                                                    | 0.2 (-0.1-0.4) <sup>d</sup>   | 0.19                 |
| Augmentation index                                       | 27             | 20.0 (13.3)   | 17.1 (12.4)   | 27            | 22.8 (13.1)   | 18.4 (12.6)   | 54                                                    | -0.9 (-7.7-6.0)               | 0.80                 |
| SCORE2 median (IQR) <sup>§</sup>                         | 11             | 3 (2-6)       | 3 (2-6)       | 9             | 4 (3-6)       | 4 (2-5)       | 20                                                    |                               | 0.15 <sup>b</sup>    |
| Presence of increased CVD, n (%)                         | 28             | 23 (82)       | 22 (79)       | 30            | 25 (83)       | 25 (83)       | 58                                                    |                               | 0.60 <sup>c</sup>    |
| RAID, 0-10, 10=worst, median (IQR) <sup>⊖</sup>          | 8              | 3.5 (2.4-4.5) | 3.5 (1.3-5.2) | 15            | 1.8 (0.4-3.2) | 1.7 (0.5-3.4) | 23                                                    |                               | 0.95 <sup>b</sup>    |
| PsAID, 0-10, 10=worst, median (IQR) <sup>#</sup>         | 7              | 0.8 (0.3-1.0) | 0.5 (0.2-1.6) | 6             | 1.2 (0.8-1.7) | 1.6 (1.0-3.3) | 13                                                    |                               | 0.43 <sup>b</sup>    |
| BASDAI, 0-10, 10=severe, median (IQR) <sup>£</sup>       | 10             | 2.7 (1.5-4.0) | 2.4 (1.4-4.4) | 8             | 2.2 (1.2-6.5) | 2.2 (0.8-6.3) | 18                                                    |                               | 0.31 <sup>b</sup>    |
| BASFI, 0-10, 10=impossible, median (IQR) <sup>£</sup>    | 10             | 1.8 (0.9-2.5) | 1.5 (0.7-2.1) | 8             | 1.9 (1.2-3.2) | 1.6 (1.2-3.1) | 18                                                    |                               | 0.40 <sup>b</sup>    |
| BAS-G, 0-10, 10= very severe, median (IQR) <sup>£</sup>  | 10             | 3.0 (1.0-4.0) | 2.0 (1.0-3.5) | 8             | 2.8 (1.5-6.5) | 3.5 (2.0-6.0) | 18                                                    |                               | 0.20 <sup>b</sup>    |
| EuroQol-5D-5L utility index, 0-1, 1= best health state   | 28             | 0.86 (0.11)   | 0.85 (0.15)   | 30            | 0.85 (0.11)   | 0.86 (0.09)   | 58                                                    | -0.1 (-0.01-0.0) <sup>d</sup> | 0.56                 |
| EuroQol-5D-5L, VAS 0-100, 100= best imaginable health)   | 28             | 65 (18)       | 74 (17)       | 29            | 61 (22)       | 68 (15)       | 58                                                    | 5 (2-12)                      | 0.18                 |
| Self-reported change in CRF, n (%)                       |                |               |               |               |               |               |                                                       |                               |                      |
| Much better                                              |                |               | 10 (36)       |               |               | 0 (0)         |                                                       |                               |                      |
| Somewhat better                                          |                |               | 14 (50)       |               |               | 7 (23)        |                                                       |                               |                      |
| Unchanged                                                |                |               | 2 (7)         |               |               | 14 (47)       |                                                       |                               |                      |
| Somewhat worse                                           |                |               | 4 (4)         |               |               | 9 (30)        |                                                       |                               |                      |
| Much worse                                               | 28             | na            | 1 (4)         | 30            | na            | 0 (0)         | 58                                                    |                               | <0.001 <sup>c*</sup> |
| <i>Exercise beliefs and self-efficacy (sub-domains)</i>  |                |               |               |               |               |               |                                                       |                               |                      |
| Self-efficacy, 1-20, 20= best                            | 27             | 16.1 (2.3)    | 16.7 (2.8)    | 29            | 16.0 (3.3)    | 16.6 (3.2)    | 56                                                    | -0.0 (-1.3-1.3)               | 0.98                 |
| Barriers to exercise, 1-15, 15= best                     | 27             | 12.7 (1.7)    | 12.5 (1.7)    | 29            | 11.8 (2.0)    | 11.6 (2.4)    | 56                                                    | 0.1 (-0.8-1.0)                | 0.87                 |
| Benefits of exercise, 1-25, 25= best                     | 28             | 21.9 (2.3)    | 21.4 (2.4)    | 30            | 21.0 (3.1)    | 20.2 (4.0)    | 58                                                    | 0.4 (-0.8-1.6) <sup>d</sup>   | 0.51                 |
| Impact of exercise on IJD, 1-40, 40=best                 | 28             | 31.0 (3.4)    | 32.4 (3.0)    | 29            | 30.4 (3.8)    | 29.7 (3.8)    | 57                                                    | 2.3 (0.9-3.8)                 | <0.01                |

<sup>^</sup>Primary analysis without multiple imputation, <sup>§</sup> All patients, including patient with change in betablocker from baseline (n=1) <sup>§</sup> calculated in patients free from statins and blood pressure medication at baseline and 6-months. <sup>a</sup>Analysed with ANCOVA with gender, group, age at baseline and baseline value as covariates.

<sup>b</sup>Analysed with Wilcoxon rank sum. <sup>c</sup>Analysed with Chi-square test. <sup>d</sup>Bootstrap CI with 50 iterations. <sup>⊖</sup>patients with RA, <sup>#</sup>patients with PsA, <sup>£</sup>patients with SpA. BASDAI: Bath Ankylosing Spondylitis Disease Activity Index, BASFI: Bath Ankylosing Spondylitis Functional Index, BAS-G: Bath Ankylosing Spondylitis Patient Global Score, CRF: Cardiorespiratory fitness, CVD: Cardiovascular disease, IJD: Inflammatory joint disease, PsAID: Psoriatic Arthritis Impact of Disease, RAID: Rheumatoid Arthritis Impact of Disease, SCORE2: Systemic COronary Risk Estimation 2, VO<sub>2peak</sub>: Peak oxygen uptake

Table d: SARS-CoV-2 incidence for the exercise group and control group.

| Variable                                              | Exercise group<br>(n=26) | Control group<br>(n=28) | p-values <sup>a</sup> |
|-------------------------------------------------------|--------------------------|-------------------------|-----------------------|
| SARS-CoV-2 infection from baseline to 3 months, n (%) | 9 (35)                   | 9 (32)                  | 0.85                  |
|                                                       | Exercise group<br>(n=27) | Control group<br>(n=30) |                       |
| SARS-CoV-2 infection from 3 months to 6 months, n (%) | 6 (22)                   | 8 (27)                  | 0.70                  |

<sup>a</sup>Analysed with Chi-square test. Missing data omitted from analyses.

Table e: Exercise habits, reported retrospectively at 6-month follow-up. Significant differences signaled by \*

| Variable                                                     | Exercise group (n=28) | Control group (n=30) | p-values <sup>a</sup> |
|--------------------------------------------------------------|-----------------------|----------------------|-----------------------|
| Regular exercise past 3 months ( $\geq 1$ /week), yes, n (%) | 20 (71)               | 19 (63)              | 0.18                  |
| Exercise frequency (sessions pr. week)                       |                       |                      |                       |
| 1-2 sessions/week, n (%)                                     | 8 (29)                | 11 (37)              |                       |
| 3-4 sessions/week, n (%)                                     | 10 (25)               | 8 (27)               |                       |
| 5 or more sessions/week, n (%)                               | 2 (7)                 | 0 (0)                | 0.26                  |
| Exercise mode                                                |                       |                      |                       |
| Aerobic exercise, n (%)                                      | 18 (64)               | 8 (27)               | 0.004*                |
| Strength exercise, n (%)                                     | 11 (29)               | 11 (37)              | 0.84                  |
| Mobility exercise, n (%)                                     | 10 (43)               | 6 (20)               | 0.18                  |
| Other mode of exercise, n (%)                                | 0 (0)                 | 5 (6)                | 0.02*                 |

<sup>a</sup>Analysed with Chi-square test. Loss to follow-up omitted (n=2, HIIT group)
